# 1 The COVID-19 herd immunity threshold is not low: A re-analysis of 2 European data from spring of 2020

3 Spencer J. Fox<sup>1</sup>, Pratyush Potu<sup>2</sup>, Michael Lachmann<sup>3</sup>, Ravi Srinivasan<sup>4</sup>, Lauren Ancel Meyers<sup>1,3</sup>

4

5 1 - Department of Integrative Biology, The University of Texas at Austin

6 2 - Department of Mathematics, The University of Texas at Austin

7 3 - The Santa Fe Institute

8 4 - Applied Research Laboratories, The University of Texas at Austin

## 9 Commentary

10 The time course and burden of the COVID-19 pandemic will depend on the herd  
11 immunity threshold (HIT) of the virus, which is the fraction of the population that needs to be  
12 immunized for an epidemic to slow in the absence of mitigation efforts. Estimates for the  
13 COVID-19 HIT range from 6% to over 60%<sup>1,2</sup>. Given that roughly 10% of the global population  
14 has been infected<sup>3</sup>, the low end of this range implies that the pandemic should soon burn out on  
15 its own, while the high end paints a grim picture of future morbidity and mortality, in the absence  
16 of pervasive non-pharmacological interventions, efficacious vaccines, or life-saving drugs.

17 The recent publication of the Great Barrington Declaration (GBD), which calls for  
18 relaxing all public health interventions on young, healthy individuals, has brought the question of  
19 herd immunity to the forefront of COVID-19 policy discussions<sup>4,5</sup>. The authors state that  
20 “immunity in the population is playing a substantial role in controlling the spread,” tacitly  
21 referencing preprints by multiple GBD authors that posit HITs of 10-20%<sup>2,6</sup>. Evidence against  
22 this claim is mounting, including pandemic resurgences throughout Europe and the US and  
23 attack rates exceeding 50% in the hardest hit regions and congregate living settings<sup>7-9</sup>.

24           Given that this unpublished work is fundamentally shaping public discourse and global  
25 policy, reconciling its claims with the rapidly evolving state of the pandemic is paramount. To  
26 this end, we reevaluated the core model from the study and have identified a fundamental flaw  
27 that leads to underestimation of the COVID-19 HIT. The authors sought to identify the *cause* of  
28 the summer slowdown in four European countries by *fitting* an SEIR-like model of COVID-19  
29 transmission to case count data up to July of 2020. The analysis is structured so that one of two  
30 explanations are possible. Either the pandemic is self-limiting (i.e., the HIT is low) or social  
31 distancing and other community mitigation efforts slowed transmission. However, teasing apart  
32 the contributions of these factors from the case data alone is statistically impossible. In other  
33 words, one cannot estimate the HIT without making assumptions about the efficacy of  
34 community mitigation, and vice versa (See supplement).

35           So the researchers made a strong assumption about community mitigation efforts in  
36 Europe in the spring and summer of 2020. Roughly, they assume that Europe locked down  
37 throughout April and then returned to *normal* (linearly) by the end of August (Figure 1A - Blue).  
38 By assuming that interventions disappear steeply, the model concludes that the pandemic must  
39 be fading due to immunity buildup, and thus estimates low HITs. As it turns out, the derived HIT  
40 is highly sensitive to the assumed timeline of mitigation (Figure S2-S3) and we have good  
41 reason to believe their assumption is flawed. The authors use mobility traces to justify their  
42 pattern<sup>2</sup>, but other precautionary policies like school closures, wearing of face coverings, and  
43 social distancing have likely kept transmission repressed far below the pre-April baseline  
44 (Figure 1A - Black). When we plug this *plausible* scenario into the Aguas et al. model<sup>2</sup> (Figure  
45 1A - Green), the COVID-19 HIT estimate increases six-fold for Belgium, three-fold for England,  
46 ten-fold for Portugal, and six-fold for Spain (Figure 1B). A range of alternative scenarios produce  
47 similar estimates (Figure S2-S3). If policymakers were to adopt a *herd immunity strategy*, in  
48 which the virus is allowed to spread relatively unimpeded, we project that cumulative COVID-19  
49 deaths would total almost 650,000 (95% CI: 500,000 - 780,000) across all four countries

50 through the end of the pandemic under the revised HIT estimates, roughly five-fold higher that  
51 projected under the original low HIT estimates (Figure S4).

52 The fragility of the Aguas et al. study<sup>2</sup> undermines a key premise of GBD and other  
53 recent calls for “herd immunity” strategies. To their credit, the authors clearly demonstrate that  
54 population heterogeneity in susceptibility to infection can dramatically lower the herd immunity  
55 threshold<sup>10</sup>. However, their model can only disentangle the impacts of heterogeneity versus  
56 interventions on COVID-19 transmission when approached with sufficient data and validated  
57 assumptions. Our rough, but arguably more plausible, re-estimates of the COVID-19 HIT  
58 corroborate strong signals in the data and compelling arguments that most of the globe remains  
59 far from herd immunity. Moreover, abandoning community mitigation efforts would jeopardize  
60 the welfare of communities and integrity of healthcare systems.

61

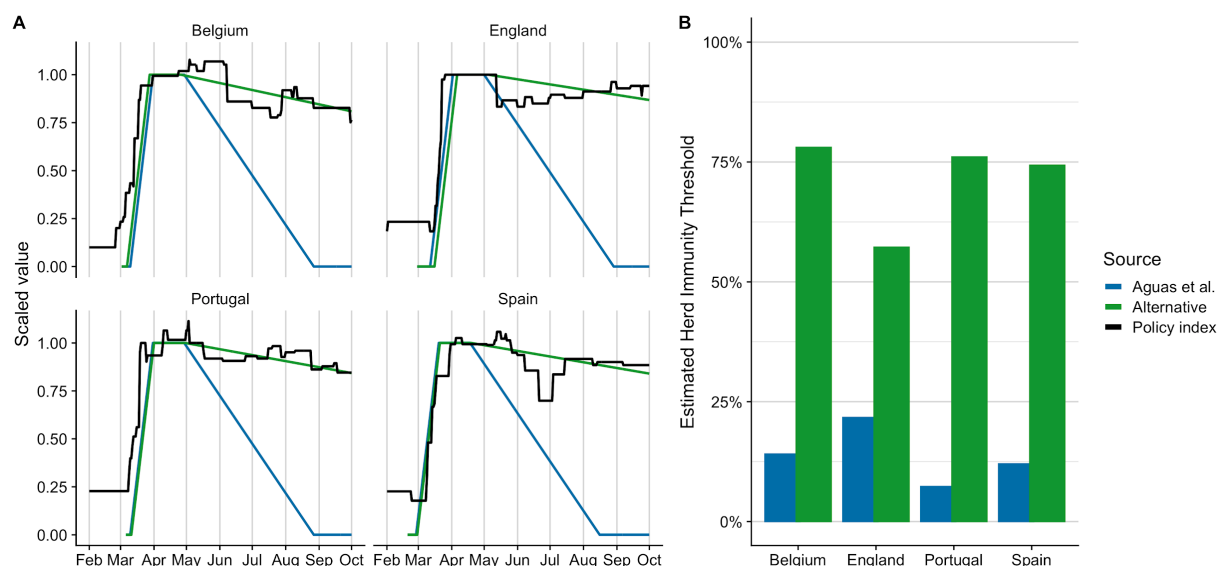

62  
63 **Figure 1: Re-estimation of the COVID-19 herd immunity thresholds (HIT) in four European**

64 **countries, using the model of Aguas et al.<sup>2</sup>. (A) Strength of non-pharmacological**  
65 **interventions indicated by a government response index<sup>11</sup> (black) compared to the trends**  
66 **assumed by Aguas et al.<sup>2</sup> (blue) and plausible alternatives (green) derived to match the**  
67 **observed indices. The time-series are scaled for comparison, where values of zero and one**

68 correspond to lack of mitigation efforts and the average level of community mitigation in April,  
69 respectively. (B) Estimated HIT using the Aguas et al.<sup>2</sup> approach, under the original assumption  
70 that non-pharmacological efforts rapidly decrease to baseline (blue) and alternative assumption  
71 that measures mirror the government response index (green).

## 72 Acknowledgements

73 The authors thank the authors of Aguas et al.<sup>2</sup>, for sharing their research code and data, which  
74 allowed us to replicate and extend their analyses. We acknowledge the UT COVID-19 Modeling  
75 Consortium for helpful discussion and comments, and the Texas Advanced Computing Center  
76 (TACC) at The University of Texas at Austin for providing HPC resources that have contributed  
77 to the research results reported within this paper. URL: <http://www.tacc.utexas.edu>. We also  
78 acknowledge support from a CDC COVID-19 supplementary grant (U01IP001136-01-01).

## 79 Author Contributions

80 SJF, ML, and LAM conceived of the initial idea. PP carried out all analyses. RS and ML  
81 developed the analytical framework for statistical identifiability. SJF and LAM supervised the  
82 research. SJF and LAM wrote the initial draft. All authors significantly contributed to the  
83 manuscript and approved the final draft. PP, SJF, and RS verified the underlying data.

## 84 Declaration of interests

85 The authors declare no conflicts of interest.  
86

## 87 References

88 1 Fontanet A, Cauchemez S. COVID-19 herd immunity: where are we? *Nat Rev Immunol*  
89 2020; **20**: 583–4.

- 90 2 Aguas R, Corder RM, King JG, Goncalves G, Ferreira MU, M. Gomes MG. Herd immunity  
91 thresholds for SARS-CoV-2 estimated from unfolding epidemics. *Epidemiology*. 2020;  
92 published online July 24. DOI:10.1101/2020.07.23.20160762.
- 93 3 Keaten J. WHO: 10% of world's people may have been infected with virus. Associated  
94 Press. 2020; published online Oct 5. [https://apnews.com/article/virus-outbreak-archive-](https://apnews.com/article/virus-outbreak-archive-united-nations-54a3a5869c9ae4ee623497691e796083)  
95 [united-nations-54a3a5869c9ae4ee623497691e796083](https://apnews.com/article/virus-outbreak-archive-united-nations-54a3a5869c9ae4ee623497691e796083) (accessed Nov 10, 2020).
- 96 4 Great Barrington Declaration. <https://gbdeclaration.org/> (accessed Nov 3, 2020).
- 97 5 Alwan NA, Burgess RA, Ashworth S, *et al*. Scientific consensus on the COVID-19  
98 pandemic: we need to act now. *Lancet* 2020; **396**: e71–2.
- 99 6 Colombo M, Mellor J, Colhoun HM, M. Gomes MG, McKeigue PM. Trajectory of COVID-19  
100 epidemic in Europe. *Infectious Diseases (except HIV/AIDS)*. 2020; published online Sept  
101 28. DOI:10.1101/2020.09.26.20202267.
- 102 7 Buss LF, Prete CA Jr, Abraham CMM, *et al*. COVID-19 herd immunity in the Brazilian  
103 Amazon. *Infectious Diseases (except HIV/AIDS)*. 2020; published online Sept 21.  
104 DOI:10.1101/2020.09.16.20194787.
- 105 8 Hagan LM. Mass Testing for SARS-CoV-2 in 16 Prisons and Jails — Six Jurisdictions,  
106 United States, April–May 2020. *MMWR Morb Mortal Wkly Rep* 2020; **69**.  
107 DOI:10.15585/mmwr.mm6933a3.
- 108 9 McMichael TM, Currie DW, Clark S, *et al*. Epidemiology of Covid-19 in a Long-Term Care  
109 Facility in King County, Washington. *N Engl J Med* 2020; **382**: 2005–11.
- 110 10 Gomes MGM, Corder RM, King JG, *et al*. Individual variation in susceptibility or exposure to  
111 SARS-CoV-2 lowers the herd immunity threshold. *medRxiv* 2020; published online May 2.  
112 DOI:10.1101/2020.04.27.20081893.
- 113 11 Hale T, Webster S, Petherick A, Phillips T, Kira B. Oxford covid-19 government response  
114 tracker. *Blavatnik School of Government* 2020; **25**.

115

116

117

118

119

1 Supplementary information for “The COVID-19  
2 herd immunity threshold is not low: A re-analysis  
3 of European data from spring of 2020”

4 Spencer J. Fox Pratyush Potu Michael Lachmann  
5 Ravi Srinivasan Lauren Ancel Meyers

6 November 11, 2020

7 **1 Overview**

8 The low COVID-19 herd immunity thresholds (HITs) of 6-21% estimated in  
9 Aguas et al. [1] are inconsistent with other model-derived estimates [5, 9, 2] and  
10 seroprevalence-based estimates from some of the hardest hit regions around the  
11 world [3]. To explain this apparent discrepancy, we conducted a thorough review  
12 of their methods and code. We identified key assumptions about the timing and  
13 extent of community mitigation efforts that shift the COVID-19 HIT estimates  
14 downward. As their code was made openly available (<https://github.com/mmgomes1/covid>), we apply their exact model structure and fitting procedure  
15 to evaluate the sensitivity of the HIT estimates to these assumptions.

16 Below, we detail our: (1) slight modification to their model fitting procedure,  
17 (2) sensitivity analyses with respect to the assumed mitigation curves (i.e.,  
18 timing and magnitude of transmission reduction via non-pharmacological inter-  
19 ventions), (3) derivation of alternate *plausible* mitigation curves from the Oxford  
20 COVID-19 Government Response Tracker response index data, (4) long-range  
21 COVID-19 mortality projections depending on the estimate HIT, and, finally (5)  
22 mathematical argument regarding the statistical non-identifiability the model  
23 (i.e., inability to simultaneously estimate the impact of community mitiga-  
24 tion and population heterogeneity). The code used for the primary analyses  
25 along with the data can be accessed here: <https://github.com/pratyush16/VariationalSusceptibility>  
26  
27

28 **2 Modification to the Aguas et al. model**

29 We slightly modified the modeling framework of Aguas et al. [1] to include  
30 an additional month of COVID-19 incidence data (through August 7th, 2020)  
31 for Belgium (<https://epistat.wiv-isp.be/covid/>) and England (<https://coronavirus.data.gov.uk/details/about-data>). For Portugal and Spain we  
32

33 analyzed data through July 10th, 2020 as in [1]. We made this adjustment to  
34 address a strong tendency of the model to estimate a low HIT without evidence  
35 of increased transmission following intense mitigation during the initial stay at  
36 home orders.

### 37 **3 Sensitivity of COVID-19 HIT estimates to mit-** 38 **igation curves**

39 We analyzed the sensitivity of the HIT estimates from Aguas et al. to variations  
40 in the assumed temporal progression of the mitigation curves within their mod-  
41 eling framework. Specifically they assume a general shape of mitigation where  
42 mitigation begins, increases until it reaches a maximum level, remains at the  
43 maximum for some time, and then slowly returns to a baseline of no mitigation.  
44 In this shape there are five key parameters governing the progression: (1) the  
45 time that mitigation begins, (2) the time it takes for mitigation to take full  
46 effect, (3) the maximum impact of mitigation, (4) the duration that mitigation  
47 remains at maximum, and (5) the time for mitigation to be completely removed.

48 The modeling framework fits the timing that mitigation begins and the max-  
49 imum impact it will have, but makes assumptions about the remaining param-  
50 eters. Their framework assumes that once mitigation begins it will take 21 days  
51 to reach a maximum level, will remain there for 30 days, and will subsequently  
52 return to the original baseline level after 120 days. They test sensitivity to  
53 slight deviations of the time to return to baseline and find minimal change in  
54 HIT estimates looking at 150 or 180 days. As noted in the manuscript and  
55 seen in Figure 1, we believed their assumptions about mitigation progression  
56 were driving their low HIT estimates, so we tested the sensitivity of the low  
57 HIT estimates to a wide-range of values for the maximum mitigation duration  
58 (Figure S2) and times to return back to baseline (Figure S3). It's clear that  
59 the model is sensitive to the assumed shape of mitigation, with HIT estimates  
60 ranging from almost 5% to 85% depending on the country and assumed shape.

61 It is clear that the estimated HITs are extremely sensitive to these assump-  
62 tions, and that there are many combinations of heterogeneity and mitigation  
63 progression that can give similar fits (described in the next section), so it is  
64 extremely important that the assumed mitigation curves match reality. While  
65 Aguas et al. matched their mitigation shapes to mobility data, these data are not  
66 an accurate picture for total transmission mitigation, as decoupling of mobility  
67 and transmission has been previously noted as populations adopt precautionary  
68 behavior like mask wearing and social distancing [12].

69 Instead, we focused on the government response index developed by re-  
70 searchers at the University of Oxford [7]. This index captures 18 policy in-  
71 dicators widely implemented around the world, and produces an overall value  
72 that captures the strength of government responses through time as shown in  
73 Figure 1A. We found that the Aguas et al baseline assumptions did not match  
74 the actual progression of mitigation policies, and instead chose to fit the esti-

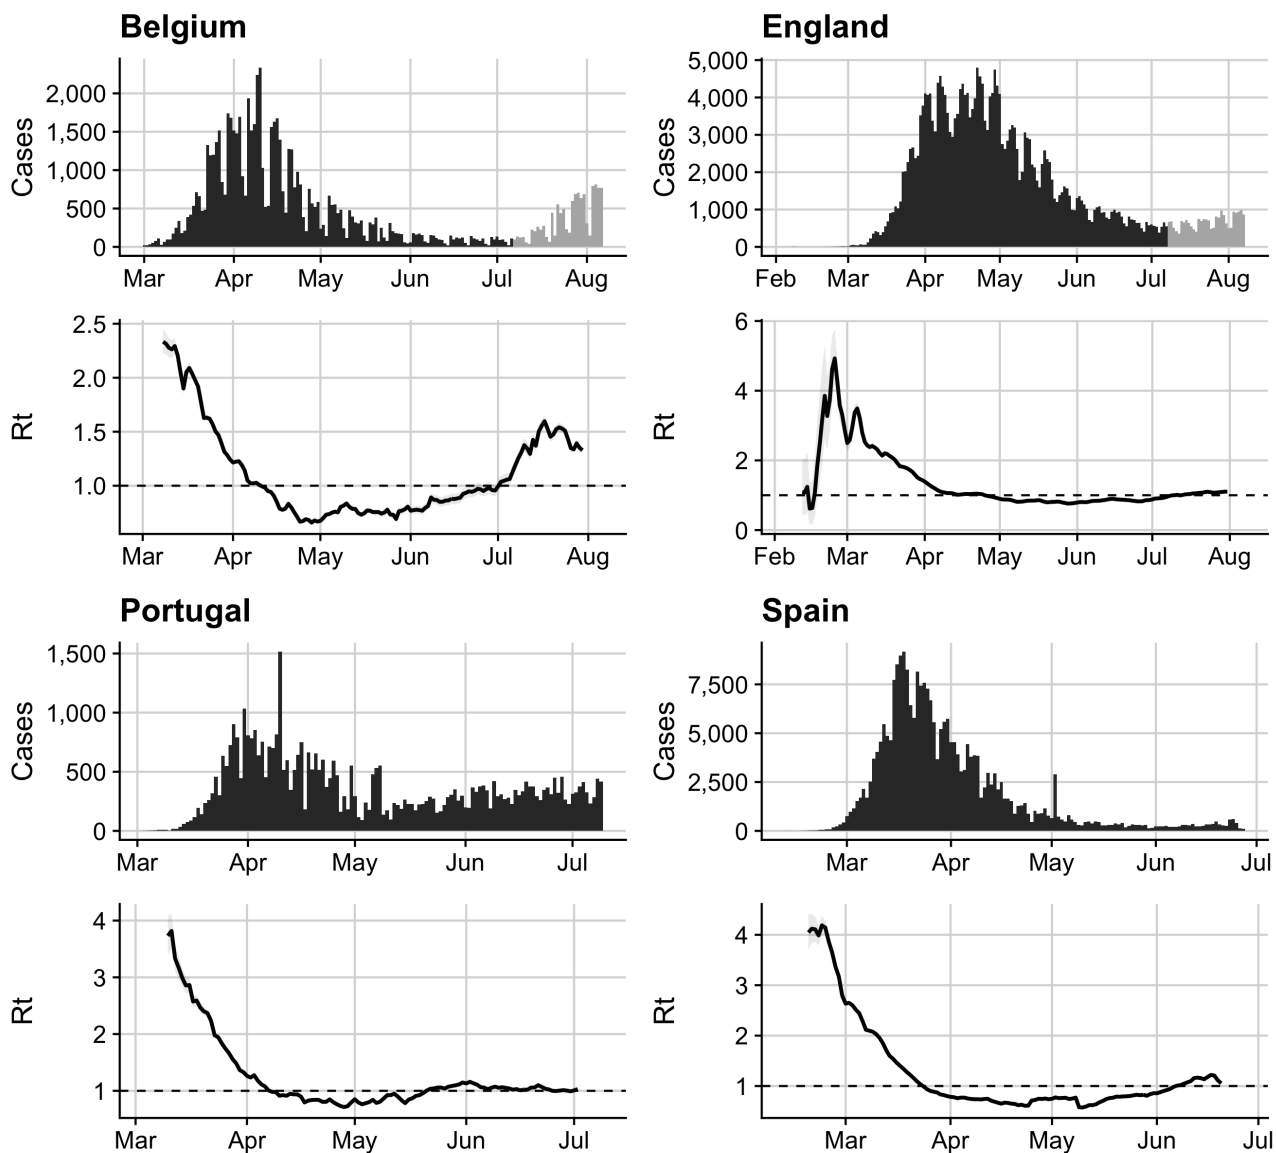

Figure S1: Country-specific case counts used for fitting alongside daily estimates of the effective reproduction number. Case counts in black indicate data used that are the same as Aguas et al, and light grey indicates the additional data we included in our fitting procedure as described in the modifications section of the supplement.

75 mated time to completely remove mitigation according to the government re-



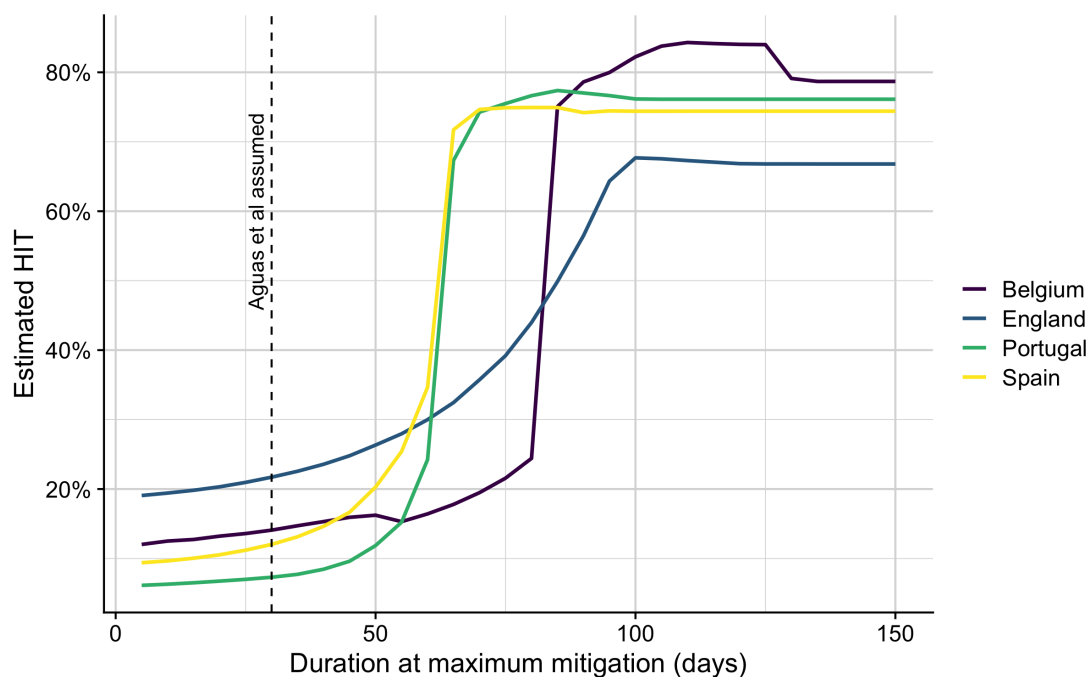

Figure S2: Sensitivity of herd immunity threshold (HIT) estimates to assumptions about the duration at maximum mitigation. Vertical black dashed line indicates the assumed value in Aguas et al. All estimates are made assuming the baseline value of time for mitigation to be completely removed of 120 days.

76 sponse index. We assumed the baseline assumptions of 21 days to implement  
77 mitigation and 30 days at maximum mitigation impact, and fit the timing to  
78 completely remove mitigation based on the trends in the government response  
79 index. Fitted estimates for the time to return to normal can be found in Figure  
80 S3 for each country, and are almost an order of magnitude larger than assumed  
81 in Aguas et al (120): Belgium (828 days), England (1,130 days), Portugal (981  
82 days), and Spain (1,033 days). While the government response index also likely  
83 doesn't capture the full progression of community mitigation, because it doesn't  
84 capture adherence to policies, we feel that it likely captures general countrywide  
85 trends better than mobility data alone.

#### 86 4 Projecting mortality under a *herd immunity* 87 policy

88 We calculated the final epidemic size for an uncontrolled epidemic based on  
89 the method described in [6] for each country. We carried out the same fitting

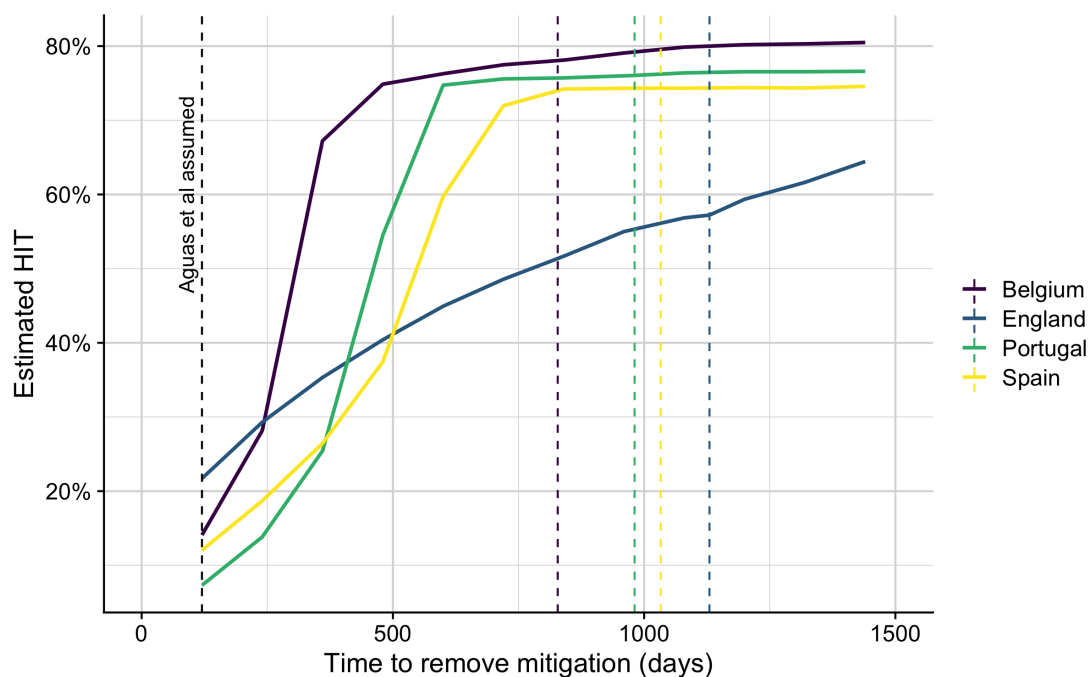

Figure S3: Sensitivity of herd immunity threshold (HIT) estimates to assumptions about the time for mitigation to be completely removed. Colored solid lines show sensitivity across all four European countries. Vertical black dashed line shows the assumed value in Aguas et al, and vertical colored lines show the fitted value from government response index used in our main analysis for each of the specific countries. All estimates are made assuming the baseline value of maximum mitigation duration of 30 days.

90 procedure as Aguas et al. using either their assumed mitigation curve or our  
91 revised version, we then calculated the mortality cost of following a “herd im-  
92 munity strategy” using the estimated parameters from each European country.  
93 For each European country we used the estimated final epidemic size estimated  
94 for that scenario as the total infection count and an infection fatality rate of  
95 0.68% (95% CI: 0.53%-0.82%) [10]. For the US, we assumed average final epi-  
96 demic sizes based on the average of the estimates for the four countries for each  
97 assumed mitigation curve scenario, which suggests final epidemic sizes of 13.9%  
98 and 79.2% for the Aguas et al. and alternative scenarios respectively. Estimates  
99 for both scenarios can be seen in Figure S4. Country population sizes were as-  
100 sumed to be 56,286,961 (England), 11,607,113 (Belgium), 10,186,314 (Portugal),  
101 46,761,086 (Spain), and 331,674,530 (United States) as estimated from UN pop-  
102 ulation statistics made available through <https://www.worldometers.info/>.

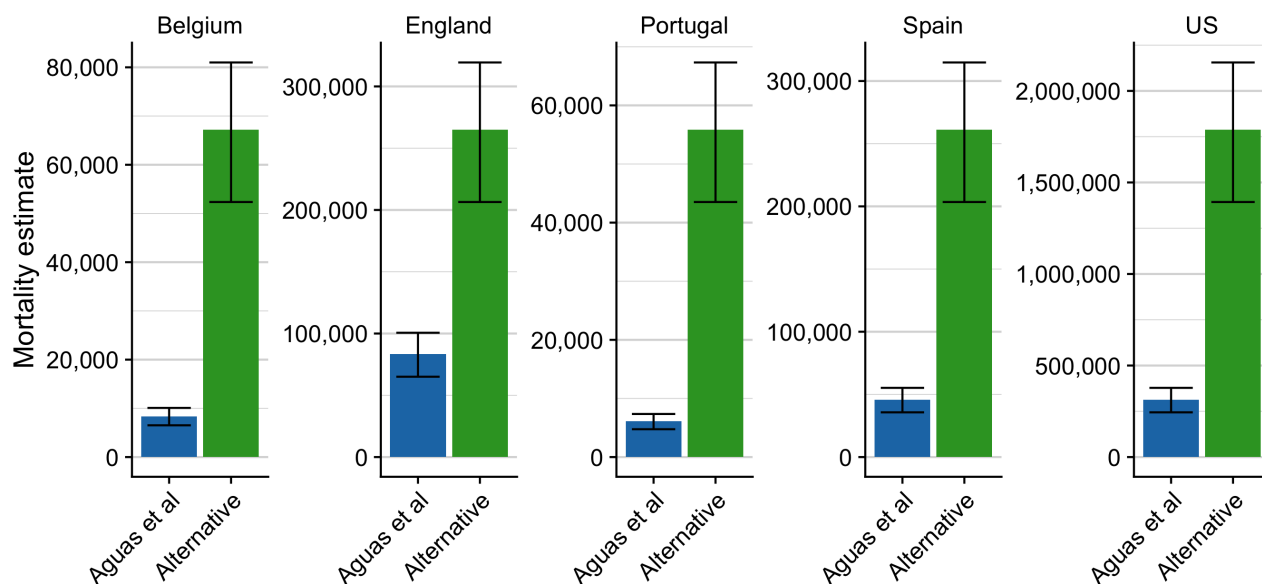

Figure S4: Mortality estimate for a herd immunity strategy for each of the four European countries and the United States. Comparison between estimated mortality if herd immunity thresholds are as low as estimated in Aguas et al (Blue), versus those estimated using the policy-based, alternative mitigation curve (Green). Estimates assume an infection fatality rate of 0.68% (95% CI: 0.53%-0.82%) [10]

## 103 5 Non-identifiability of the model

104 The model fitting procedure from Aguas et al. explains transmission dynamics  
105 between mitigation and population heterogeneity, which impacts herd immu-  
106 nity thresholds. In Aguas et al., they begin with assumed mitigation curves and  
107 estimate the herd immunity threshold. Here we describe mathematically why  
108 their estimation procedure is only identifiable with strong assumptions about  
109 the shape of the mitigation curves. We first break down the model structure  
110 into component parts to make clear the tension between mitigation and herd  
111 immunity. Then we use this analytical framework to flip their estimation proce-  
112 dure around to show how one can estimate mitigation curves that fit epidemic  
113 trajectories for any assumed herd immunity threshold.

114 To start, consider an SEIR model with variable susceptibility  $S_t(x)$  and  
115 time-dependent mitigation  $M_t$  due to non-pharmaceutical interventions (NPIs),  
116 as given in Aguas et al.:

$$\begin{aligned}\dot{S}(x) &= -x\lambda S(x)M \\ \dot{E}(x) &= x\lambda S(x)M - \delta E(x) \\ \dot{I}(x) &= \delta E(x) - \gamma I(x) \\ \dot{R}(x) &= \gamma I(x)\end{aligned}$$

117 Then,

$$R_0 = \frac{\beta}{\gamma}, \quad R_t = \frac{\beta}{\gamma} \bar{S}_t M_t = R_0 \bar{S}_t M_t,$$

118 where  $R_0$  is the basic reproduction number,  $R_t = R_{\text{eff}}(t)$  is the effective repro-  
119 duction number at time  $t$ , and  $\bar{S}_t = \int x' S_t(x') dx'$  is the mean susceptibility at  
120 time  $t$ . More generally, we can consider time-dependent effective reproduction  
121 numbers of the form

$$R_t = R_0 F_t(S) M_t, \quad (1)$$

122 where  $F_t(S)$  is some functional of the variable susceptibility  $S_t(x)$  as a function  
123 of  $x$  (notice that the functional itself does not change over time, but that the  
124 resulting function has a time dependence since  $S_t(x)$  does). The model of Aguas  
125 et al. corresponds to the case when  $F_t(S) = \bar{S}_t$ . From this equation it is already  
126 clear that given a time series  $R_t$ , we can for every  $t$  only infer the combined  
127 impact of heterogeneity and mitigation (the product  $F_t(S)M_t$ ), but not each  
128 separately.

129 Now consider  $\tilde{R}_t = R_t/M_t = R_0 F_t(S)$ , the effective reproduction number if  
130 there was no intervention at all (i.e., if  $M_t \equiv 1$ ). Herd immunity is reached at  
131  $T = \min \{t' : \tilde{R}_t \leq 1 \text{ for all } t \geq t'\}$  (i.e., the first time after which  $\tilde{R}_t$  remains  
132 at or below 1), and the corresponding herd immunity threshold is

$$\text{HIT} = 1 - S_T,$$

133 where  $S_t = \int S_t(x') dx'$ .

## 134 Epidemic dynamics with Gamma-distributed variable sus- 135 ceptibility

136 Following a similar derivation as that in Montalban et al. [11], it can be shown  
137 that

$$S_t(x) = S_0(x) e^{-x \cdot k_t}$$

138 where  $k_t = \int_0^t \lambda_s M_s ds$  and  $\lambda_t$  is the force of infection at time  $t$ . Assuming  $S_0(x)$   
139 is a Gamma( $a, a$ ) density (where  $a$  is related to the coefficient of variation by  
140  $\text{CV} = 1/\sqrt{a}$ ), we have that

$$S_t(x) = \left( \frac{a}{a + k_t} \right)^a \text{Gamma}_{a, a+k_t}(x).$$

141 Taking integrals, it can be shown that

$$S_t = \left( \frac{a}{a + k_t} \right)^a$$

142 and

$$\bar{S}_t = \left( \frac{a}{a + k_t} \right)^{a+1} = (S_t)^{\frac{a+1}{a}}.$$

143 Using the previous formula, we have that  $S_t = (\bar{S}_t)^{\frac{a}{a+1}}$ . Since  $\tilde{R}_T =$   
 144  $R_T/M_T = 1$ , we have that  $R_0\bar{S}_T = 1$  and

$$\text{HIT} = 1 - (\bar{S}_T)^{\frac{a}{a+1}} = 1 - R_0^{-\frac{a}{a+1}}.$$

### 145 Deriving mitigation curves from herd immunity thresholds

146 We now show how it is possible to derive a mitigation curve  $M_t$  that is consistent  
 147 with the dynamics under Gamma-distributed variable susceptibility for a given  
 148 herd immunity threshold.

149 To begin, let us reparameterize time in terms of the proportion of susceptibles  
 150  $S_t$  to make our calculations simpler. First, Note that  $S_t$  is strictly monotone  
 151 decreasing so long as  $\lambda_t M_t > 0$  for all  $t$  (i.e., both the force of infection and  
 152 mitigation curve are strictly positive), and that  $S_0 = 1$  and  $S_t \rightarrow 0$  as  $t \rightarrow \infty$ .  
 153 Let  $\sigma_t = 1 - S_t$ . Then, we can reparameterize time by  $t \mapsto \sigma$  (i.e.,  $[0, \infty) \mapsto$   
 154  $[0, 1]$ ). That is, Equation (1) becomes

$$R_\sigma = R_0 F_\sigma M_\sigma.$$

155 Assume that  $F_t$  and  $R_t$  are given. Then  $M_\sigma$  can be calculated as

$$M_\sigma = \frac{R_\sigma}{R_0 F_\sigma}.$$

156 Let us write script letters for log of the values:

$$\mathcal{M}_\sigma = \log(M_\sigma) = \log(R_\sigma) - \log(R_0) - \log(F_\sigma) = \mathcal{R}_\sigma - \mathcal{R}_0 - \mathcal{F}_\sigma.$$

157 Since  $F_t(S) = (S_t)^{(a+1)/a}$ , we have that  $F_\sigma = (1 - \sigma)^{(a+1)/a}$ . Therefore,  $\mathcal{F}_\sigma =$   
 158  $\frac{a+1}{a} \log(1 - \sigma)$  and

$$\mathcal{M}_\sigma = \mathcal{R}_\sigma - \mathcal{R}_0 - \frac{a+1}{a} \log(1 - \sigma).$$

159 As before, herd immunity is reached at the value  $S_*$  of  $S$  at which no growth  
 160 occurs in the absence of intervention, i.e.,  $R_t/M_t \equiv R_*/M_* = 1$ . That is,

$$1 = R_0 F_*(S_*),$$

161 and therefore  $F_*(S_*) = R_0^{-1}$ . Let  $\sigma_* = 1 - S_* = \text{HIT}$ . Since  $F(S) = S^{(a+1)/a}$ ,  
 162 this implies

$$(1 - \sigma_*)^{\frac{a+1}{a}} = \frac{1}{R_0}.$$

163 Taking logarithms, we find that

$$\frac{a+1}{a} = \frac{-\mathcal{R}_0}{\log(1-\sigma_*)}.$$

164 Finally, substituting this into the expression above we get

$$\begin{aligned} \mathcal{M}_\sigma &= \mathcal{R}_\sigma - \mathcal{R}_0 + \frac{\mathcal{R}_0}{\log(1-\sigma_*)} \log(1-\sigma) \\ &= \mathcal{R}_0 \left( \frac{\log(1-\sigma)}{\log(1-\sigma_*)} - \left(1 - \frac{\mathcal{R}_\sigma}{\mathcal{R}_0}\right) \right). \end{aligned}$$

165 Inverting the mapping  $t \mapsto \sigma$ , we can again write this as a function of time  $t$ :

$$\mathcal{M}_t = \mathcal{R}_0 \left( \frac{\log(S_t)}{\log(S_*)} - \left(1 - \frac{\mathcal{R}_t}{\mathcal{R}_0}\right) \right).$$

166 Exponentiating both sides, we finally arrive at the expression

$$\begin{aligned} M_t &= \exp \left[ \log(\mathcal{R}_0) \left( \frac{\log(S_t)}{\log(S_*)} - \left(1 - \frac{\log(R_t)}{\log(\mathcal{R}_0)}\right) \right) \right] \\ &= R_t \cdot R_0^{\frac{\log(S_t)}{\log(1-\text{HIT})} - 1} \end{aligned} \quad (2)$$

167 This gives us a formula for calculating a mitigation curve  $M_t$  that is consistent  
168 with the underlying variable susceptibility model of Aguas et al., for any chosen  
169 value of a herd immunity threshold.

## 170 Computing mitigation curves as a function of herd immu- 171 nity threshold

172 We can see from the previous section that the model is attempting to match the  
173 dynamics seen in the data through a combination of mitigation and herd immu-  
174 nity as impacted through population heterogeneity. To further show why strong  
175 mitigation assumptions are needed to estimate the herd immunity thresholds,  
176 we show how one can craft mitigation curves to match dynamics for a wide  
177 range of herd immunity thresholds for each of the four countries investigated  
178 (Belgium, England, Portugal, and Spain).

179 Using Equation (2), we can estimate daily mitigation impacts for a given herd  
180 immunity threshold (HIT) given the necessary data. To do so, one only needs  
181 estimates for the basic reproduction number ( $R_0$ ), daily effective reproduction  
182 number ( $R_t$ ), and the proportion of the population still susceptible to the disease  
183 ( $S_t$ ). For each of the four countries we first estimated  $R_t$  using the available  
184 case data and a common method for measuring the instantaneous reproduction  
185 number assuming a mean serial interval of 5.8 days and standard deviation of  
186 4.48 days [4, 8]. We took the largest value of  $R_t$  as our rough estimate for the  
187  $R_0$ . Finally, we used the case data and the estimated country-specific reporting

188 rates estimated in Aguas et al. to estimate the true incidence of disease each  
189 day, which we converted to  $S_t$  using  $S_t = S_{t-1} - C_t/\rho$ . Here,  $C_t$  is the number  
190 of the reported cases in that country at time  $t$ , and  $\rho$  is the country-specific  
191 reporting rate from Aguas et al: Belgium (0.06), Portugal (0.09), Spain (0.059),  
192 England (0.024).

193 In Figure S5 we show the calculated mitigation curves for each country across  
194 a range of potential HITs from 20% to 70%.

## 195 References

- 196 [1] Ricardo Aguas et al. “Herd immunity thresholds for SARS-CoV-2 esti-  
197 mated from unfolding epidemics”. In: *medRxiv* (2020). DOI: 10.1101/  
198 2020.07.23.20160762. URL: [https://www.medrxiv.org/content/  
199 early/2020/08/31/2020.07.23.20160762](https://www.medrxiv.org/content/early/2020/08/31/2020.07.23.20160762).
- 200 [2] Tom Britton, Frank Ball, and Pieter Trapman. “A mathematical model  
201 reveals the influence of population heterogeneity on herd immunity to  
202 SARS-CoV-2”. en. In: *Science* 369.6505 (Aug. 2020), pp. 846–849.
- 203 [3] Lewis F Buss et al. “COVID-19 herd immunity in the Brazilian Amazon”.  
204 Sept. 2020.
- 205 [4] Anne Cori et al. “A New Framework and Software to Estimate Time-  
206 Varying Reproduction Numbers During Epidemics”. In: *American Jour-  
207 nal of Epidemiology* 178.9 (Sept. 2013), pp. 1505–1512. ISSN: 0002-9262.  
208 DOI: 10.1093/aje/kwt133. eprint: [https://academic.oup.com/aje/  
209 article-pdf/178/9/1505/17341195/kwt133.pdf](https://academic.oup.com/aje/article-pdf/178/9/1505/17341195/kwt133.pdf). URL: [https://doi.  
210 org/10.1093/aje/kwt133](https://doi.org/10.1093/aje/kwt133).
- 211 [5] Arnaud Fontanet and Simon Cauchemez. “COVID-19 herd immunity:  
212 where are we?” en. In: *Nat. Rev. Immunol.* 20.10 (Oct. 2020), pp. 583–584.
- 213 [6] M Gabriela M Gomes et al. “Individual variation in susceptibility or ex-  
214 posure to SARS-CoV-2 lowers the herd immunity threshold”. In: *medRxiv*  
215 (2020). DOI: 10.1101/2020.04.27.20081893. URL: [https://www.  
216 medrxiv.org/content/early/2020/05/21/2020.04.27.20081893](https://www.medrxiv.org/content/early/2020/05/21/2020.04.27.20081893).
- 217 [7] Thomas Hale et al. “Oxford covid-19 government response tracker”. In:  
218 *Blavatnik School of Government* 25 (2020).
- 219 [8] Xi He et al. “Temporal dynamics in viral shedding and transmissibility of  
220 COVID-19”. en. In: *Nat. Med.* (Apr. 2020).
- 221 [9] Kin On Kwok et al. *Herd immunity – estimating the level required to halt  
222 the COVID-19 epidemics in affected countries*. 2020.
- 223 [10] Gideon Meyerowitz-Katz and Lea Merone. “A systematic review and meta-  
224 analysis of published research data on COVID-19 infection-fatality rates”.  
225 en. In: *Int. J. Infect. Dis.* (Sept. 2020).

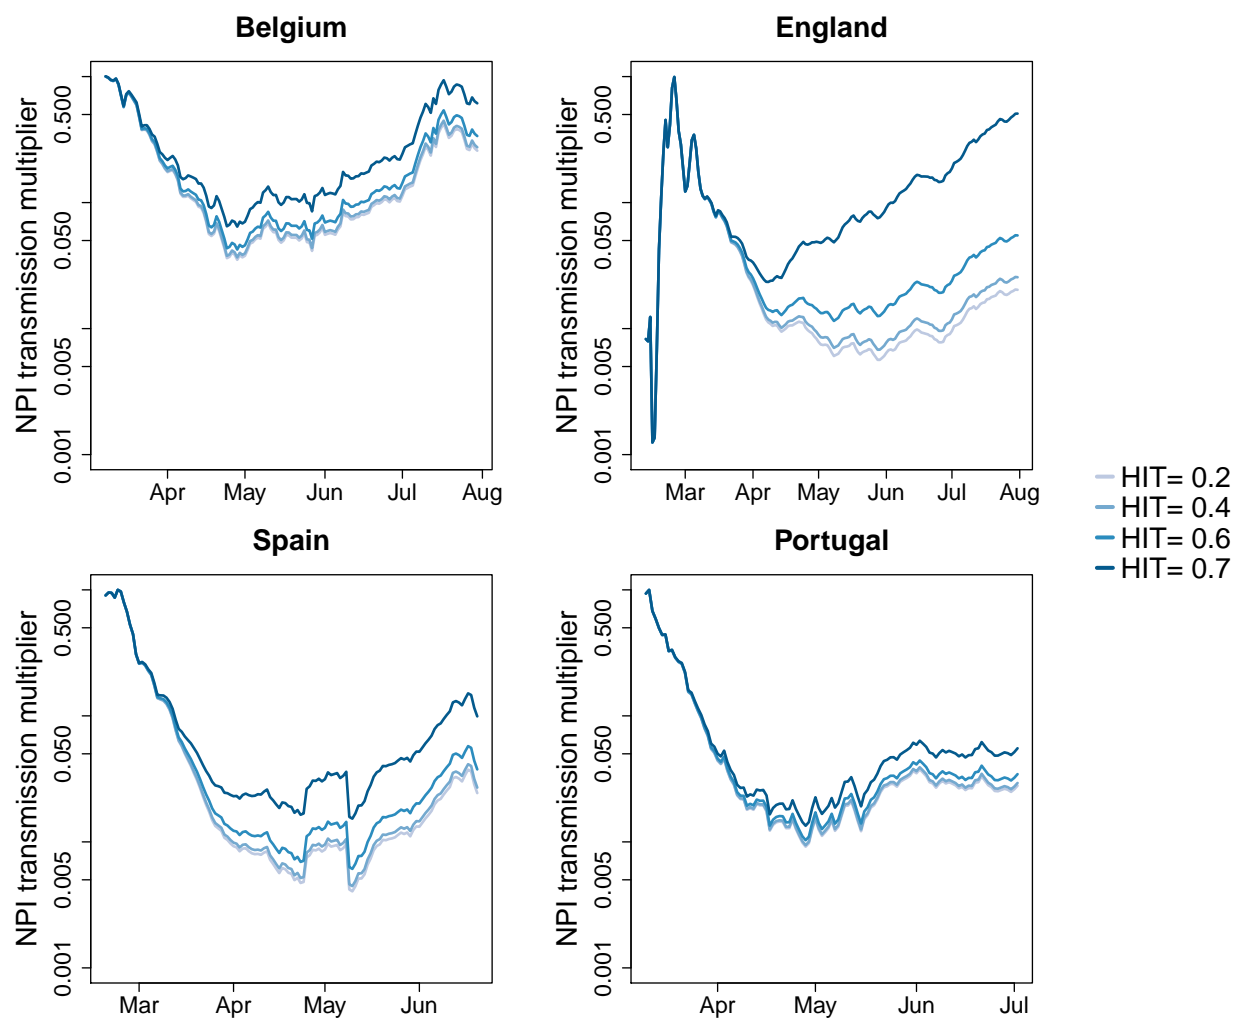

Figure S5: Using cases data and  $R_t$  estimation we calculate  $M_t$ , the NPI transmission multiplier timelines that would be inferred to have a predetermined HIT.



- 226 [11] Antonio Montalbán, Rodrigo M. Corder, and M. Gabriela M. Gomes. *Herd*  
227 *immunity under individual variation and reinfection*. 2020. arXiv: 2008.  
228 00098 [q-bio.PE].
- 229 [12] P Nouvellet et al. “Report 26: Reduction in mobility and COVID-19 trans-  
230 mission”. In: (). URL: [https://spiral.imperial.ac.uk/handle/10044/](https://spiral.imperial.ac.uk/handle/10044/1/79643)  
231 [1/79643](https://spiral.imperial.ac.uk/handle/10044/1/79643).
